# Supplementary material for: HIV-1 Protease as DNA Immunogen against Drug Resistance in HIV-1 Infection: DNA Immunization with Drug Resistant HIV-1 Protease Protects Mice from Challenge with Protease-Expressing Cells
Source: MDPI journal article supplement (doi:10.3390/cancers15010238), 2022-12-30
Supplement: s1 [file s1]

## Supplementary materials

### Supplementary Tables

**Supplementary Table S1.** List of plasmids used in the study

| Purpose                        | Abbreviated plasmid name | Plasmid backbone (vector, reference) | Antibiotic resistance gene | Promoter | Cloned synthetic protease (PR) gene | Abbreviated name | Mutations in PR        |
|--------------------------------|--------------------------|--------------------------------------|----------------------------|----------|-------------------------------------|------------------|------------------------|
| Prokaryotic expression vectors | pET15b-PR_A              | pET15b                               | AmpR                       | lacI     | Consensus FSU_A PR                  | PR_A             | none                   |
|                                | pET15b-PR_Aimut          |                                      |                            |          | Inactivated consensus FSU_A PR      | PR_Ai            | D25N                   |
|                                | pET15b-PR_A2mut          |                                      |                            |          | Drug resistant (DR) FSU-A PR        | PR_A2mut         | M46I, I54V             |
|                                | pET15b-PR_Ai2mut         |                                      |                            |          | Inactivated drug resistant FSU-A PR | PR_Ai2mut        | D25N; M46I, I54V       |
|                                | pET15b-PR_A3mut          |                                      |                            |          | DR FSU-A PR                         | PR_A3mut         | M46I, I54V, V82A       |
|                                | pET15b-PR_Ai3mut         |                                      |                            |          | Inactivated DR FSU-A PR             | PR_Ai3mut        | D25N; M46I, I54V, V82A |

|                               |                                         |                                     |      |        |                                   |           |                  |
|-------------------------------|-----------------------------------------|-------------------------------------|------|--------|-----------------------------------|-----------|------------------|
| Eukaryotic expression vectors | pVAX1                                   | pVAX1 (Invitrogen)                  | KanR | IE CMV | none                              | none      | none             |
|                               | pKCMVPR_B<br>(Hallengard et al., 2011)  | pKCMV (Kjerrstrom and Wahren, 1999) |      |        | HIV-1 HXB-2 PR                    | PR_B      | none             |
|                               | pKCMVPR_Bi<br>(Hallengard et al., 2011) | pKCMV (Kjerrstrom and Wahren, 1999) |      |        | Inactivated HIV-1 HXB-2 PR        | PR_Bi     | D25N             |
|                               | pVax_PR_B                               | pVAX1                               |      |        | HIV-1 HXB-2 PR                    | PR_B      | none             |
|                               | pVax_PR_Bi                              |                                     |      |        | Inactivated HIV-1 HXB-2 PR        | PR_Bi     | D25N             |
|                               | pVax_PR_A                               |                                     |      |        | Consensus FSU_A PR                | PR_A      | none             |
|                               | pVax_PR_Ai                              |                                     |      |        | Inactivated consensus FSU_A PR    | PR_Ai     | D25N             |
|                               | pVax_PR_A2mut                           |                                     |      |        | DR consensus FSU-A PR             | PR_A2mut  | M46I, I54V       |
|                               | pVax_PR_Ai2mut                          |                                     |      |        | Inactivated DR consensus FSU-A PR | PR_Ai2mut | D25N; M46I, I54V |
|                               | pVax_PR_A3mut                           |                                     |      |        | DR consensus FSU-A PR             | PR_A2mut  | M46I, I54V, V82A |

|                    |                |                                       |      |      |                                         |           |                                 |
|--------------------|----------------|---------------------------------------|------|------|-----------------------------------------|-----------|---------------------------------|
|                    | pVax_PR_Ai3mut |                                       |      |      | Inactivated DR<br>consensus<br>FSU-A PR | PR_Ai3mut | D25N;<br>M46I,<br>I54V,<br>V82A |
| Lentiviral vectors | pLVPR_A2mut    | pRRLSIN.cPPT.PGK<br>(Addgene, #12252) | AmpR | hPGK | DR consensus<br>FSU-A PR                | PR_A2mut  | M46I,<br>I54V                   |
|                    | pLVPR_Ai2mut   |                                       |      |      | DR consensus<br>FSU-A PR                | PR_Ai2mut | D25N;<br>M46I,<br>I54V          |
|                    | pLVPR_A3mut    |                                       |      |      | DR consensus<br>FSU-A PR                | PR_A2mut  | DM46I,<br>I54V,<br>V82A         |
|                    | pLVPR_Ai3mut   |                                       |      |      | Inactivated DR<br>consensus<br>FSU-A PR | PR_Ai3mut | D25N;<br>M46I,<br>I54V,<br>V82A |
|                    |                |                                       |      |      |                                         |           |                                 |

**Supplementary Table S2. Statistical analysis of the differences in the frequencies of CD8+ T cells producing cytokines in response to stimulation with protease derived peptides in pooled groups of PR\_Ai immunized mice (PR\_Ai, PR\_Ai2mut and PR\_Ai3mut) and mice receiving empty vector pVAX1 after booster immunization (Series II, Table 1).** Percent of responding CD8+ T cells was assessed by flow cytometry with ICCS (see Materials and Methods for details). Sequences of peptides used for stimulation are presented in Fig. 1C. Statistical analysis was done using Mann-Whitney U-test, p values <0.05 were considered as significant (given in red).

| Peptide  | Cytokine produced by peptide stimulated CD8+ T cells | P value |
|----------|------------------------------------------------------|---------|
| A1-15    | IFN- $\gamma$                                        | 0,0485  |
|          | IL-2                                                 | 0,0485  |
|          | TNF- $\alpha$                                        | 0,0162  |
|          | IFN- $\gamma$ / IL-2/ TNF- $\alpha$                  | 0,0465  |
| A31-56   | IFN- $\gamma$                                        | 0,7798  |
|          | IL-2                                                 | 0,0990  |
|          | TNF- $\alpha$                                        | 0,5495  |
|          | IFN- $\gamma$ / IL-2/ TNF- $\alpha$                  | 0,0687  |
| A31-56dr | IFN- $\gamma$                                        | 0,7778  |
|          | IL-2                                                 | 0,0040  |
|          | TNF- $\alpha$                                        | >0,9999 |
|          | IFN- $\gamma$ / IL-2/ TNF- $\alpha$                  | 0,7798  |
| A56-70   | IFN- $\gamma$                                        | 0,5455  |
|          | IL-2                                                 | 0,3475  |
|          | TNF- $\alpha$                                        | 0,0485  |
|          | IFN- $\gamma$ / IL-2/ TNF- $\alpha$                  | 0,7818  |
| AB71-85  | IFN- $\gamma$                                        | 0,0162  |
|          | IL-2                                                 | >0,9999 |
|          | TNF- $\alpha$                                        | 0,7798  |
|          | IFN- $\gamma$ / IL-2/ TNF- $\alpha$                  | 0,0465  |

|           |                                     |         |
|-----------|-------------------------------------|---------|
| AB71-85dr | IFN- $\gamma$                       | 0,7778  |
|           | IL-2                                | >0,9999 |
|           | TNF- $\alpha$                       | 0,7818  |
|           | IFN- $\gamma$ / IL-2/ TNF- $\alpha$ | 0,5535  |
| AB75-84   | IFN- $\gamma$                       | 0,0040  |
|           | IL-2                                | 0,0162  |
|           | TNF- $\alpha$                       | 0,0040  |
|           | IFN- $\gamma$ / IL-2/ TNF- $\alpha$ | 0,0040  |
| A76-90    | IFN- $\gamma$                       | 0,2000  |
|           | IL-2                                | 0,2020  |
|           | TNF- $\alpha$                       | 0,0465  |
|           | IFN- $\gamma$ / IL-2/ TNF- $\alpha$ | 0,0040  |
| A76-90dr  | IFN- $\gamma$                       | 0,7778  |
|           | IL-2                                | 0,2000  |
|           | TNF- $\alpha$                       | 0,3475  |
|           | IFN- $\gamma$ / IL-2/ TNF- $\alpha$ | 0,3475  |

**Supplementary Table S3.** Statistical analysis of differences in the frequencies of CD8+ T cells producing cytokines in response to stimulation with protease derived peptides between groups of mice DNA immunized with PR\_A variants or empty vector after booster immunization (**Series II, Table 1**). Percent of responding CD8+ T cells was assessed by flow cytometry with ICCS (see Materials and Methods for details). Sequences of peptides used in stimulation are presented in Fig. 1C.

| Peptide | Cytokine                                                           | Groups compared                                | Statistical test* | p value       |
|---------|--------------------------------------------------------------------|------------------------------------------------|-------------------|---------------|
| A1-15   | IFN- $\gamma$<br>Kruskal-Wallis<br>$p=0.03$                        | PR_Ai versus PR_Ai2mut                         | Mann-Whitney      | 0,5333        |
|         |                                                                    | PR_Ai3mut versus naïve                         | Mann-Whitney      | >0,9999       |
|         |                                                                    | (PR_Ai + PR_Ai2mut) versus (PR_Ai3mut + naïve) | Mann-Whitney      | <b>0,0095</b> |
|         | IL-2<br>Kruskal-Wallis<br>$p=0.03$                                 | PR_Ai versus PR_Ai2mut                         | Mann-Whitney      | 0,5333        |
|         |                                                                    | PR_Ai3mut versus naïve                         | Mann-Whitney      | >0,9999       |
|         |                                                                    | (PR_Ai + PR_Ai2mut) versus (PR_Ai3mut + naïve) | Mann-Whitney      | <b>0,0095</b> |
|         | TNF- $\alpha$<br>Kruskal-Wallis<br>$p=0.04$                        | PR_Ai versus PR_Ai2mut                         | Mann-Whitney      | >0,9999       |
|         |                                                                    | PR_Ai3mut versus naïve                         | Mann-Whitney      | 0,6667        |
|         |                                                                    | (PR_Ai + PR_Ai2mut) versus (PR_Ai3mut + naïve) | Mann-Whitney      | <b>0,0095</b> |
|         | IFN- $\gamma$ / IL-2/ TNF- $\alpha$<br>Kruskal-Wallis<br>$p=0.005$ | PR_Ai versus PR_Ai2mut                         | Mann-Whitney      | 0,1333        |
|         |                                                                    | PR_Ai3mut versus naïve                         | Mann-Whitney      | >0,9999       |
|         |                                                                    | (PR_Ai + PR_Ai2mut) versus (PR_Ai3mut + naïve) | Mann-Whitney      | <b>0,0095</b> |
| AB71-85 | IFN- $\gamma$                                                      | All groups                                     | Kruskal-Wallis    | 0,9473        |
|         | IL-2                                                               | All groups                                     | Kruskal-Wallis    | 0,3492        |
|         | TNF- $\alpha$                                                      | All groups                                     | Kruskal-Wallis    | 0,2800        |

|           |                                                                   |                                                    |                |        |
|-----------|-------------------------------------------------------------------|----------------------------------------------------|----------------|--------|
|           | IFN- $\gamma$ / IL-2/ TNF- $\alpha$<br>Kruskal-Wallis<br>$p=0.04$ | PR_Ai / PR_Ai3mut /<br>naïve                       | Kruskal-Wallis | 0,2095 |
|           |                                                                   | PR_Ai2mut versus<br>(PR_Ai + PR_Ai3mut +<br>naïve) | Mann-Whitney   | 0,0444 |
| AB71-85dr | IFN- $\gamma$<br>Kruskal-Wallis<br>$p=0.1$                        | PR_Ai / PR_Ai2mut /<br>naïve                       | Kruskal-Wallis | 0,6952 |
|           |                                                                   | PR_Ai3mut versus<br>(PR_Ai + PR_Ai2mut +<br>naïve) | Mann-Whitney   | 0,0444 |
|           | IL-2                                                              | All groups                                         | Kruskal-Wallis | 0,2203 |
|           | TNF- $\alpha$                                                     | All groups                                         | Kruskal-Wallis | 0,3492 |
|           | IFN- $\gamma$ / IL-2/ TNF- $\alpha$<br>Kruskal-Wallis<br>$p=0.05$ | PR_Ai / PR_Ai2mut /<br>naïve                       | Kruskal-Wallis | 0,2190 |
|           |                                                                   | PR_Ai3mut versus<br>(PR_Ai + PR_Ai2mut +<br>naïve) | Mann-Whitney   | 0,0444 |
| AB75-84   | IFN- $\gamma$<br>Kruskal-Wallis<br>$p=0.02$                       | PR_Ai versus<br>PR_Ai2mut                          | Mann-Whitney   | 0,8000 |
|           |                                                                   | PR_Ai3mut versus naïve                             | Mann-Whitney   | 0,3333 |
|           |                                                                   | (PR_Ai+PR_Ai2mut)<br>versus (PR_Ai3mut +<br>naïve) | Mann-Whitney   | 0,0095 |
|           | IL-2<br>Kruskal-Wallis<br>$p=0.02$                                | PR_Ai versus<br>PR_Ai2mut                          | Mann-Whitney   | 0,5333 |
|           |                                                                   | PR_Ai3mut versus naïve                             | Mann-Whitney   | 0,6667 |
|           |                                                                   | (PR_Ai+PR_Ai2mut)<br>versus (PR_Ai3mut +<br>naïve) | Mann-Whitney   | 0,0095 |
|           | TNF- $\alpha$<br>Kruskal-Wallis<br>$p=0.04$                       | PR_Ai versus<br>PR_Ai2mut                          | Mann-Whitney   | 0,5333 |
|           |                                                                   | PR_Ai3mut versus naïve                             | Mann-Whitney   | 0,3333 |

|          |                                                                              |                                                    |                                                               |         |
|----------|------------------------------------------------------------------------------|----------------------------------------------------|---------------------------------------------------------------|---------|
|          |                                                                              | (PR_Ai+PR_Ai2mut)<br>versus (PR_Ai3mut +<br>naïve) | Mann-Whitney                                                  | 0,0190  |
|          | IFN- $\gamma$ / IL-2/ TNF- $\alpha$<br><br>Kruskal-Wallis<br><b>p=0.0013</b> | PR_Ai versus<br>PR_Ai2mut                          | Mann-Whitney                                                  | 0,1333  |
|          |                                                                              | PR_Ai3mut versus naïve                             | Mann-Whitney                                                  | 0,3333  |
|          |                                                                              | (PR_Ai+PR_Ai2mut)<br>versus (PR_Ai3mut +<br>naïve) | Mann-Whitney                                                  | 0,0095  |
| A76-90   | IFN- $\gamma$                                                                | All groups                                         | Kruskal-Wallis                                                | 0,1765  |
|          | IL-2                                                                         | All groups                                         | Kruskal-Wallis                                                | 0,0930  |
|          | TNF- $\alpha$<br><br>Kruskal-Wallis<br><b>p=0.04</b>                         | PR_Ai versus<br>PR_Ai2mut                          | Mann-Whitney                                                  | >0,9999 |
|          |                                                                              | PR_Ai3mut versus naïve                             | Mann-Whitney                                                  | >0,9999 |
|          |                                                                              | (PR_Ai+PR_Ai2mut)<br>versus (PR_Ai3mut +<br>naïve) | Mann-Whitney                                                  | 0,0095  |
|          | IFN- $\gamma$ / IL-2/ TNF- $\alpha$<br><br>Kruskal-Wallis<br><b>p=0.02</b>   | PR_Ai versus<br>PR_Ai2mut                          | Mann-Whitney                                                  | 0,8000  |
|          |                                                                              | PR_Ai3mut versus naïve                             | Mann-Whitney                                                  | 0,3333  |
|          |                                                                              | (PR_Ai+PR_Ai2mut)<br>versus (PR_Ai3mut +<br>naïve) | Mann-Whitney                                                  | 0,0095  |
| A76-90dr | IFN- $\gamma$                                                                | All groups                                         | Kruskal-Wallis                                                | 0,5517  |
|          | IL-2                                                                         | All groups                                         | Kruskal-Wallis                                                | 0,1121  |
|          | TNF- $\alpha$                                                                | PR_Ai3mut versus<br>PR_Ai                          | Kruskal-Wallis<br>with Dunn's<br>multiple<br>comparisons test | 0,0228  |
|          |                                                                              | PR_Ai3mut versus<br>PR_Ai2mut                      |                                                               | 0,7430  |
|          |                                                                              | PR_Ai3mut versus naïve                             |                                                               | >0,9999 |
|          | IFN- $\gamma$ / IL-2/ TNF- $\alpha$                                          | PR_Ai / PR_Ai2mut /<br>naïve                       | Kruskal-Wallis                                                | 0,6952  |



|  |                          |                                                    |              |        |
|--|--------------------------|----------------------------------------------------|--------------|--------|
|  | Kruskal-Wallis<br>p=0.16 | PR_Ai3mut versus<br>(PR_Ai + PR_Ai2mut +<br>naïve) | Mann-Whitney | 0,0444 |
|--|--------------------------|----------------------------------------------------|--------------|--------|

\* Responses to a peptide registered by the groups were first assessed by Kruskal-Wallis test. If p value for a selection of groups was  $>0.05$ , samples were assumed to belong to the same group, and groups were fused. Fused groups are listed in brackets. Two types of fusions were made: of (PR\_Ai + PR\_Ai2mut) as two immunogens inducing similar pattern of cellular immune response, and (PR\_Ai3mut + naïve) as not exhibiting this pattern. The other was (PR\_Ai + PR\_Ai2mut + naïve) as not exhibiting the pattern of immune response characteristic to PR\_Ai3mut. Values of  $p < 0.05$  in Kruskal-Wallis test indicated that entries belong to different groups. Significance of differences between the groups was further analyzed in pairs using Mann Whitney U-test.

**Supplementary Table S4. Welfare chart for groups of BALB/c mice (n=6 per group) DNA immunized with PR\_Ai, or equimolar mix of PR\_Ai2mut and PR\_AI3mut (DR PR mix), or empty vector pVAX1, or PBS via prime/boost regimen followed by electroporation (Table 1, Series III).** General health condition of the animals was assessed by a veterinary doctor daily according to the chart A without scoring. An in-depth clinical examination was performed weekly according to the chart B with scoring. For each animal the general health condition was described by marking checkboxes corresponding to normal or altered condition. Altered conditions, if noted, were to be further specified in the “Comments” section. General condition of the animals corresponded to physiological norm throughout whole study period. Animals from all groups actively consumed feed and water. Social behavior, pose, coordination, breathing, defecation, urination, reaction to stimuli, muscle tone, the condition of the coat, mucous membranes, eyes, nasal cavity, oral cavity and other parameters corresponded to the physiological norm. The condition of all animals at all time-points was registered as normal. Electroporation caused round-shaped burns 3–4 mm in diameter on the skin of all animals, independently of the injected agent; burns resolved before the first weekly examination.

| <b>A. Parameters assessed daily</b>    |                                           |
|----------------------------------------|-------------------------------------------|
| Behavior                               | Normal                                    |
|                                        | Altered (depression/agitation)            |
| Reaction to stimuli                    | Normal                                    |
|                                        | Altered (decrease/increase)               |
| Skin                                   | Normal                                    |
|                                        | Altered (redness/pallor/cyanosis/icteric) |
| Mucous membranes                       | Normal                                    |
|                                        | Altered (redness/pallor/cyanosis/icteric) |
| Discharge<br>(nasal/eyes/anal/uretral) | Normal                                    |
|                                        | Altered                                   |
| Muscle tone                            | Normal                                    |
|                                        | Altered (decrease/increase)               |
| Coordination                           | Normal                                    |
|                                        | Altered (ataxia/hyperkinesis)             |
| Breathing                              | Normal                                    |
|                                        | Altered (dyspnea/pathologic)              |
| Feed and water<br>consumption          | Normal                                    |
|                                        | Altered (decrease/increase)               |
| Death                                  |                                           |

| Parameters assessed weekly          |                                                          |                          |          |
|-------------------------------------|----------------------------------------------------------|--------------------------|----------|
| Parameters                          |                                                          | Mark if <u>yes</u>       | Comments |
| Parameters assessed weekly in cage  |                                                          |                          |          |
| Behavior                            | Normal                                                   | <input type="checkbox"/> |          |
|                                     | Altered (depression/agitation)                           | <input type="checkbox"/> |          |
| Social interactions                 | Normal                                                   | <input type="checkbox"/> |          |
|                                     | Altered (aggression)                                     | <input type="checkbox"/> |          |
| Parameters assessed weekly in hands |                                                          |                          |          |
| Reaction to stimuli                 | Normal                                                   | <input type="checkbox"/> |          |
|                                     | Altered (decrease/increase)                              | <input type="checkbox"/> |          |
| Body composition                    | Normal                                                   | <input type="checkbox"/> |          |
|                                     | Altered (wasting/obesity)                                | <input type="checkbox"/> |          |
| Muscle tone                         | Normal                                                   | <input type="checkbox"/> |          |
|                                     | Altered (decrease/increase)                              | <input type="checkbox"/> |          |
| Fur                                 | Normal                                                   | <input type="checkbox"/> |          |
|                                     | Altered (disheveled/shedding/dull/dirty/discolored)      | <input type="checkbox"/> |          |
| Skin                                | Normal                                                   | <input type="checkbox"/> |          |
|                                     | Altered (describe: turgor, color, wounds, palpable mass) | <input type="checkbox"/> |          |
| Mucous membranes                    | Normal                                                   | <input type="checkbox"/> |          |
|                                     | Altered (redness/pallor/cyanosis/icteric)                | <input type="checkbox"/> |          |
| Eyes                                | Normal                                                   | <input type="checkbox"/> |          |
|                                     | Altered (exophthalmos/wounds/redness/discharge)          | <input type="checkbox"/> |          |
| Ears                                | Normal                                                   | <input type="checkbox"/> |          |
|                                     | Altered (inflammation/discharge)                         | <input type="checkbox"/> |          |
| Nose                                | Normal                                                   | <input type="checkbox"/> |          |

|                                                 |                                                                |                          |  |
|-------------------------------------------------|----------------------------------------------------------------|--------------------------|--|
|                                                 | Altered (serous discharge/purulent discharge/bloody discharge) | <input type="checkbox"/> |  |
| Mouth                                           | Normal                                                         | <input type="checkbox"/> |  |
|                                                 | Altered (hypersalivation, blood, damaged teeth)                | <input type="checkbox"/> |  |
| <b>Parameters assessed weekly in open field</b> |                                                                |                          |  |
| Pose                                            | Normal                                                         | <input type="checkbox"/> |  |
|                                                 | Altered (stereotypic movements, laying on side)                | <input type="checkbox"/> |  |
| Coordination                                    | Normal                                                         | <input type="checkbox"/> |  |
|                                                 | Altered (ataxia/hyperkinesis)                                  | <input type="checkbox"/> |  |
| Breathing                                       | Normal                                                         | <input type="checkbox"/> |  |
|                                                 | Altered (dyspnea/pathologic)                                   | <input type="checkbox"/> |  |
| Urine                                           | Normal                                                         | <input type="checkbox"/> |  |
|                                                 | Altered (discoloration)                                        | <input type="checkbox"/> |  |
| Feces                                           | Normal                                                         | <input type="checkbox"/> |  |
|                                                 | Altered (diarrhea/blood/discoloration)                         | <input type="checkbox"/> |  |
| Other                                           | Describe                                                       | <input type="checkbox"/> |  |

**Supplementary Table S5. Body mass assessment of the groups of BALB/c mice (n=6 per group) DNA immunized with PR\_Ai, or equimolar mix of PR\_Ai2mut and PR\_AI3mut, or empty vector pVAX1, or PBS via prime/boost regimen followed by electroporation on day 12 after booster immunization (Table 1, Series III).** Statistical analysis of body mass data at each time point was done using fixed-effects model with Geisser-Greenhouse correction followed by Tukey's multiple comparisons. Differences were considered significant at  $P < 0.05$ . There were no significant differences in the body mass between the recipients of any of the plasmids and the control group receiving PBS.

| Days after first immunization | Study group |             |             |             |
|-------------------------------|-------------|-------------|-------------|-------------|
|                               | PR_Ai       | DR PR mix   | pVAX        | PBS         |
|                               | (n=6)       | (n=6)       | (n=5*)      | (n=6)       |
|                               | Mean±SD (g) | Mean±SD (g) | Mean±SD (g) | Mean±SD (g) |
| <b>0 (Day of Prime)</b>       | 23.7±1.9    | 24.3±1.3    | 23.8±1.3    | 24.3±1.2    |
| <b>1</b>                      | 22.3±1.5    | 23.4±1.3    | 23±1        | 24±1.5      |
| <b>3</b>                      | 22.4±2      | 23.5±1.1    | 23±0.9      | 23.8±1.2    |
| <b>4</b>                      | 22.5±1.7    | 23.7±1.5    | 23.4±0.8    | 24.1±1.2    |
| <b>5</b>                      | 23±1.9      | 24.1±1.5    | 24.1±0.7    | 24.4±1.1    |
| <b>6</b>                      | 23.3±2.1    | 24.3±1.6    | 24.2±0.8    | 24.7±1.3    |
| <b>7</b>                      | 23.4±2.2    | 24.5±1.5    | 24.2±0.8    | 24.7±1.3    |
| <b>8</b>                      | 23.3±2.2    | 24.6±1.5    | 24.3±0.8    | 25.3±1.4    |
| <b>11</b>                     | 23.5±2.3    | 25.3±1.7    | 24.7±1.2    | 25.6±1.4    |
| <b>12</b>                     | 23.9±2.3    | 25.3±1.9    | 24.6±1.2    | 25.5±1.3    |
| <b>13</b>                     | 24.2±2.3    | 25.4±1.8    | 25.1±1.1    | 26±1.4      |
| <b>14</b>                     | 24.5±2.2    | 25.7±1.7    | 25.4±1.1    | 26.4±1.5    |
| <b>15</b>                     | 24.4±2.4    | 26.1±1.9    | 25.6±1.1    | 26.5±1.6    |
| <b>18</b>                     | 24.8±2.4    | 26.1±1.9    | 25.7±1.1    | 26.4±1.7    |
| <b>19</b>                     | 24.9±2.1    | 26.2±1.8    | 26±1.3      | 26.8±1.5    |
| <b>20</b>                     | 24±2.3      | 25.8±1.9    | 25.2±1.5    | 26.3±1.3    |
| <b>22</b>                     | 24.4±2.4    | 25.6±2.2    | 25±1.4      | 26±1.2      |

|                               |          |          |          |          |
|-------------------------------|----------|----------|----------|----------|
| <b>25 (Day 1 after Boost)</b> | 24.3±2.6 | 25.8±1.9 | 24.8±2   | 26.5±1.5 |
| <b>26</b>                     | 24.5±2.5 | 25.8±1.9 | 24.8±2.3 | 26.8±1.5 |
| <b>27</b>                     | 24.9±2.5 | 26.2±2   | 24.9±2.7 | 27±1.4   |
| <b>28</b>                     | 25.1±2.6 | 26.4±1.6 | 24.9±2.3 | 27.3±1.3 |
| <b>29</b>                     | 24.9±2.5 | 26.3±1.8 | 24.9±2.4 | 26.6±1.2 |
| <b>36</b>                     | 24.7±2.6 | 25.9±1.5 | 24.3±2.4 | 26.4±1.1 |

\* One mouse in group pVAX1 died during the experiment, as it did not recover from anesthesia after the first immunization.

**Supplementary Table S6. Results of the complete blood count analysis for BALB/c mice (n=6 per group) DNA immunized with PR\_Ai, or equimolar mix of PR\_Ai2mut and PR\_AI3mut (DR PR mix), or empty vector pVAX1, or PBS via prime/boost regimen followed by electroporation on day 12 after booster immunization (end-point of the study; Table 1, Series III). Data is presented as mean  $\pm$  SD. Statistically significance of differences was assessed using Kruskal-Wallis test with Dunn's multiple comparisons.**

| Immunogen                              | PR_Ai*    |           | PR DR mix* |           | PR_Ai**   |           | PR DR mix** |           | pVAX1**   |           | PBS       |           |
|----------------------------------------|-----------|-----------|------------|-----------|-----------|-----------|-------------|-----------|-----------|-----------|-----------|-----------|
| Assessment day                         | day 1     | day 12    | day 1      | day 12    | day 1     | day 12    | day 1       | day 12    | day 1     | day 12    | day 1     | day 12    |
| unclassified leukocytes (MID)          | 2.47+0.33 | 2.90+0.30 | 2.37+0.31  | 2.37+0.22 | 2.47+0.33 | 2.90+0.30 | 2.37+0.31   | 2.37+0.22 | 2.72+0.48 | 2.46+0.34 | 2.72+0.22 | 2.73+0.67 |
| unclassified leukocytes (MID), Stat*** | ns        | ns        | ns         | ns        | ns        | ns        | ns          | ns        | ns        | ns        | N/A       | N/A       |

-\* compared to pVAX1

-\*\* compared to PBS

- \*\*\*Statistic was done with Kruskal-Wallis test with Dunn's multiple comparisons correction

**Supplementary Table S7. Bone marrow composition of BALB/c mice (n=6 per group) DNA immunized with PR\_Ai, or equimolar mix of PR\_Ai2mut and PR\_AI3mut (DR PR mix), or empty vector pVAX1, or PBS via prime/boost regimen followed by electroporation on day 12 after booster immunization (end-point of the study; Table 1, Series III).** Statistically significance of differences were assessed using Kruskal-Wallis test with Dunn's multiple comparisons.

[illegible]





|                         |           |           |           |           |           |           |           |           |           |           |           |           |
|-------------------------|-----------|-----------|-----------|-----------|-----------|-----------|-----------|-----------|-----------|-----------|-----------|-----------|
| Eosinophils             | 1.33+0.52 | 1.33+0.82 | 1.00+0.00 | 1.00+0.00 | 1.33+0.52 | 1.33+0.82 | 1.00+0.00 | 1.00+0.00 | 1.17+0.41 | 1.40+0.55 | 1.33+0.52 | 1.17+0.41 |
| Eosinophils,<br>Stat*** | ns        | N/A       | N/A       |
| Other cells             | 1.17+0.41 | 0.50+0.55 | 1.00+0.00 | 0.83+0.41 | 1.17+0.41 | 0.50+0.55 | 1.00+0.00 | 0.83+0.41 | 0.67+0.52 | 0.80+0.45 | 1.00+0.00 | 0.83+0.41 |
| Other cells,<br>Stat*** | ns        | N/A       | N/A       |

-\* compared to pVAX1

-\*\* compared to PBS

- \*\*\*Statistic was done with Kruskal-Wallis test with Dunn's multiple comparisons correction

**Supplementary Table S8. Mass of axillary and inguinal lymph nodes of BALB/c mice (n=6 per group) DNA immunized with PR\_Ai, or equimolar mix of PR\_Ai2mut and PR\_AI3mut (DR PR mix), or empty vector pVAX1, or PBS via prime/boost regimen followed by electroporation on day 12 after booster immunization (end-point of the study; Table 1, Series III). Data represent organ mass as % to body mass, mean±SD. Statistical significance of the differences was assessed by the Kruskal-Wallis test with Dunn's multiple comparisons test.**

| Immunogen                    | PR_Ai*    |           | PR DR mix* |           | PR_Ai**   |           | PR DR mix** |           | pVAX1**   |           | PBS       |           |
|------------------------------|-----------|-----------|------------|-----------|-----------|-----------|-------------|-----------|-----------|-----------|-----------|-----------|
| Assessment day               | day 1     | day 12    | day 1      | day 12    | day 1     | day 12    | day 1       | day 12    | day 1     | day 12    | day 1     | day 12    |
| Inguinal lymph node          | 0.03±0.01 | 0.03±0.01 | 0.02±0.01  | 0.03±0.01 | 0.03±0.01 | 0.03±0.01 | 0.02±0.01   | 0.03±0.01 | 0.03±0.01 | 0.04±0.01 | 0.02±0.01 | 0.12±0.25 |
| Inguinal lymph node, Stat*** | ns        | ns        | ns         | ns        | ns        | ns        | ns          | ns        | ns        | ns        | N/A       | N/A       |

-\* compared to pVAX1

-\*\* compared to PBS

- \*\*\*Statistic was done with Kruskal-Wallis test with Dunn's multiple comparisons correction

**Table S9. Results of the analysis of blood biochemistry of BALB/c mice DNA immunized with PR\_Ai, or equimolar mix of PR\_Ai2mut and PR\_Ai3mut (DR PR mix), or empty vector pVAX1, or PBS via prime/boost regimen followed by electroporation on day 12 after booster immunization** (end-point of the study; **Table 1, Series III**). Biochemical analysis including measurement of the levels of alanine aminotransferase (ALT), aspartate aminotransferase (AST), alkaline phosphatase (ALP), lactate dehydrogenase (LDH), total protein (TP), albumin (ALB), urea (UREA), glucose (GLC), cholesterol (CHOL), triglycerides (TG), sodium (Na) and potassium (K) was performed using Stat Fax 4500+ biochemical analyzer (Awareness technology, Ramsey, MN, USA) according to manufacturer's protocols. Values represent mean  $\pm$  SD. Statistical significance of the differences was assessed by the Kruskal-Wallis test with Dunn's multiple comparisons test. Differences were considered significant at  $P < 0.05$ .

| Immunogen        | PR_Ai*               |                      | PR DR mix*           |                      | PR_Ai**              |                      | PR DR mix**          |                      | pVAX1**              |                      | PBS                  |                      |
|------------------|----------------------|----------------------|----------------------|----------------------|----------------------|----------------------|----------------------|----------------------|----------------------|----------------------|----------------------|----------------------|
| Assessment day   | day 1                | day 12               |
| AST, U/L         | 286,92 $\pm$ 52,27   | 230,34 $\pm$ 35,46   | 335,82 $\pm$ 105,07  | 190,38 $\pm$ 70,20   | 286,92 $\pm$ 52,27   | 230,34 $\pm$ 35,46   | 335,82 $\pm$ 105,07  | 190,38 $\pm$ 70,20   | 342,18 $\pm$ 87,25   | 324,54 $\pm$ 115,57  | 313,38 $\pm$ 49,13   | 290,28 $\pm$ 71,14   |
| AST, Stat***     | ns                   | N/A                  | N/A                  |
| ALP, U/L         | 306,80 $\pm$ 38,43   | 428,60 $\pm$ 101,75  | 346,20 $\pm$ 6,61    | 315,80 $\pm$ 71,45   | 306,80 $\pm$ 38,43   | 428,60 $\pm$ 101,75  | 346,20 $\pm$ 6,61    | 315,80 $\pm$ 71,45   | 309,20 $\pm$ 44,43   | 367,00 $\pm$ 146,66  | 323,00 $\pm$ 93,46   | 402,80 $\pm$ 112,88  |
| ALP, Stat***     | ns                   | N/A                  | N/A                  |
| LDH, U/L         | 1992,20 $\pm$ 486,92 | 2481,00 $\pm$ 598,30 | 2152,00 $\pm$ 623,69 | 2181,60 $\pm$ 660,74 | 1992,20 $\pm$ 486,92 | 2481,00 $\pm$ 598,30 | 2152,00 $\pm$ 623,69 | 2181,60 $\pm$ 660,74 | 2449,20 $\pm$ 478,52 | 2931,70 $\pm$ 416,91 | 2095,80 $\pm$ 175,76 | 2726,40 $\pm$ 460,58 |
| LDH, Stat***     | ns                   | N/A                  | N/A                  |
| Albumin, g/L     | 36,60 $\pm$ 11,24    | 43,96 $\pm$ 2,11     | 40,00 $\pm$ 2,35     | 42,62 $\pm$ 7,32     | 36,60 $\pm$ 11,24    | 43,96 $\pm$ 2,11     | 40,00 $\pm$ 2,35     | 42,62 $\pm$ 7,32     | 41,40 $\pm$ 4,56     | 44,44 $\pm$ 7,71     | 36,40 $\pm$ 2,51     | 42,04 $\pm$ 7,06     |
| Albumin, Stat*** | ns                   | N/A                  | N/A                  |
| Glucose, mmol/L  | 8,45 $\pm$ 2,41      | 7,89 $\pm$ 1,43      | 8,57 $\pm$ 2,16      | 6,43 $\pm$ 1,20      | 8,45 $\pm$ 2,41      | 7,89 $\pm$ 1,43      | 8,57 $\pm$ 2,16      | 6,43 $\pm$ 1,20      | 7,20 $\pm$ 1,13      | 7,08 $\pm$ 3,17      | 10,06 $\pm$ 1,33     | 6,85 $\pm$ 1,37      |
| Glucose, Stat*** | ns                   | N/A                  | N/A                  |
| Na, mmol/L       | 121,60 $\pm$ 5,18    | 127,46 $\pm$ 9,67    | 120,20 $\pm$ 11,19   | 124,74 $\pm$ 4,57    | 121,60 $\pm$ 5,18    | 127,46 $\pm$ 9,67    | 120,20 $\pm$ 11,19   | 124,74 $\pm$ 4,57    | 121,80 $\pm$ 7,16    | 121,78 $\pm$ 6,03    | 119,80 $\pm$ 4,09    | 124,10 $\pm$ 3,94    |

|             |           |           |           |           |           |           |           |           |           |           |           |           |
|-------------|-----------|-----------|-----------|-----------|-----------|-----------|-----------|-----------|-----------|-----------|-----------|-----------|
| Na, Stat*** | ns        | N/A       | N/A       |
| K, mmol/L   | 7,66+1,31 | 7,24+1,52 | 8,92+1,53 | 6,50+2,49 | 7,66+1,31 | 7,24+1,52 | 8,92+1,53 | 6,50+2,49 | 8,68+1,05 | 7,54+2,32 | 7,12+1,75 | 8,16+1,18 |
| K, Stat***  | ns        | N/A       | N/A       |

-\* compared to pVAX1

-\*\* compared to PBS

- \*\*\*Statistic was done with Kruskal-Wallis test with Dunn's multiple comparisons correction

**Supplementary Table S10. Correlation of the biochemical parameters of the blood of BALB/c mice DNA immunized with PR\_Ai, or equimolar mix of PR\_Ai2mut and PR\_AI3mut (DR PR mix), or empty vector pVAX1, or PBS via prime/boost regimen with electroporation on day 12 after booster immunization (Table 1, Series III).** Parameters, mean per group with SD, are presented in **Table 3** and **Suppl Table S9**. Correlations were analysed using nonparametric Spearman Rank Correlation test (Statistica 11, Tibco, USA). P values <0.05 were considered significant.

| Biochemical blood parameters | Correlated to | r value in Spearman test | p       | r <sup>2</sup> |
|------------------------------|---------------|--------------------------|---------|----------------|
| Triglycerides (TGC)          | Urea          | 0.4279                   | 0.00590 | 0.1831         |
|                              | Total protein | 0.0044                   | 0.97860 | 0.0000         |
|                              | ALB           | 0.3148                   | 0.04790 | 0.0991         |
|                              | Glucose       | 0.0779                   | 0.63300 | 0.0061         |
|                              | Cholesterol   | 0.0527                   | 0.74680 | 0.0028         |
| Urea                         | Total protein | -0.0519                  | 0.75030 | 0.0027         |
|                              | ALB           | 0.2833                   | 0.07650 | 0.0803         |
|                              | Glucose       | -0.0796                  | 0.62520 | 0.0063         |
|                              | Cholesterol   | 0.0634                   | 0.69760 | 0.0040         |
|                              | TGC           | 0.4279                   | 0.00590 | 0.1831         |
| Cholesterol                  | Total protein | 0.6144                   | 0.00002 | 0.3775         |
|                              | ALB           | 0.6535                   | 0.00000 | 0.4271         |
|                              | Urea          | 0.0634                   | 0.69760 | 0.0040         |
|                              | Glucose       | 0.0596                   | 0.71470 | 0.0036         |
|                              | TGC           | 0.0527                   | 0.74680 | 0.0028         |
| Total protein                | ALB           | 0.4095                   | 0.00870 | 0.1677         |
|                              | Urea          | -0.0519                  | 0.75030 | 0.0027         |

|                |               |         |         |        |
|----------------|---------------|---------|---------|--------|
|                | Glucose       | 0.0210  | 0.89760 | 0.0004 |
|                | Cholesteroles | 0.6144  | 0.00002 | 0.3775 |
|                | TGC           | -0.0044 | 0.97860 | 0.0000 |
| Albumine (ALB) | Total protein | 0.4095  | 0.00870 | 0.1677 |
|                | Urea          | 0.2833  | 0.07650 | 0.0803 |
|                | Glucose       | 0.0592  | 0.71650 | 0.0035 |
|                | Cholesteroles | 0.6535  | 0.00000 | 0.4271 |
|                | TGC           | 0.3148  | 0.04790 | 0.0991 |
| Glucose        | Total protein | 0.0210  | 0.89760 | 0.0004 |
|                | ALB           | 0.0592  | 0.71650 | 0.0035 |
|                | Urea          | -0.0796 | 0.62520 | 0.0063 |
|                | Cholesteroles | 0.0596  | 0.71470 | 0.0036 |
|                | TGC           | -0.0779 | 0.63300 | 0.0061 |

\* One mouse in group pVAX1 died during the experiment, as it did not recover from anesthesia after the first immunization, respective measurements are missing.

## Supplementary Figures

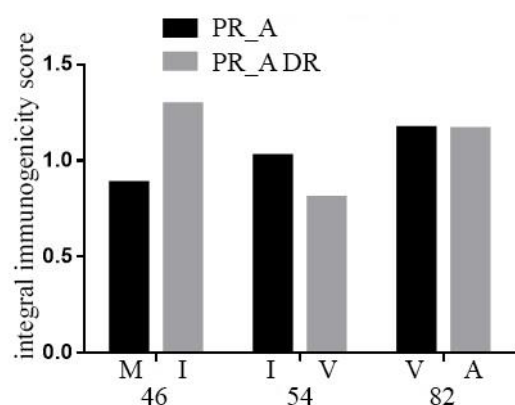

**Supplementary Figure S1.** Comparison of the integral immunogenicity scores predicting MHC class I immunogenicity of the regions of the consensus HIV-1 FSU\_A protease (PR\_A) harbouring drug resistance (DR) mutations 46I, 54V, and 82A. Respective regions from PR\_A are dubbed “PR\_A wild-type”, and from harbouring DR mutation, PR\_A DR. Integral immunogenicity score is the sum of the prediction scores of four peptides derived from respective region which have the highest scores of predicted MHC class I immunogenicity according to IEDB Immunogenicity prediction tool (see Materials and Methods for details).



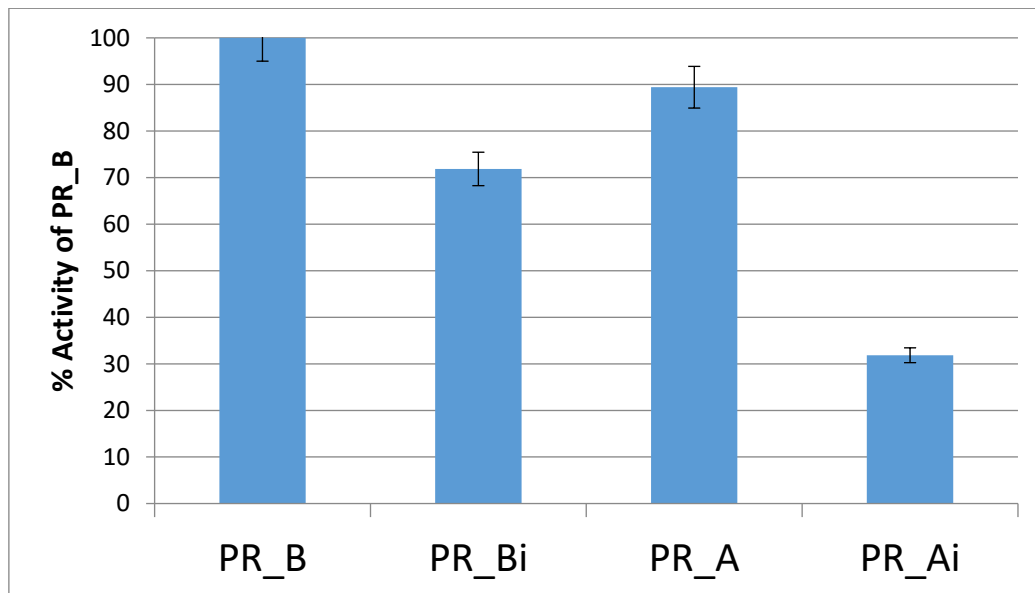

**Supplementary Figure S2.** Enzymatic activity of the variants of HIV-1 protease: consensus clade A FSU\_A protease (PR\_A), PR\_A with inactivation mutation D25N (PR\_Ai), clade B HXB-2 (PR\_B) and PR\_B with inactivation mutation D25N (PR\_Bi). Protease activity was measured in the lysates of HeLa cells transfected with eukaryotic expression vectors encoding respective PR variants (Table 1). Approximately 400 000 cells were transfected with pVAX1\_PR\_B, pVAX1\_PR\_Bi, pVAX1\_PR\_A, pVAX1\_PR\_Ai (Suppl. Table 1) with the efficacy of 65%, 48 hours post transfection cells were lysed and assessed for protease activity using FRET assay (SensoLyte 490, Anaspec, CA, USA) as described by the manufacturer. Activity was normalized to the activity of PR\_B. Data represent mean of at least two measurements, with standard error - if we can call 5% deviation a standard error?? Otherwise, add SD. The actual loss of enzymatic activity after introduction of D25N could have been higher, if PR activity was normalized to the intracellular level of the protein in expressing cells, high for inactive and low for active PR variants (Fig. 3) due to autocleavage (Mildner et al., 1994). This, however, could not be done since such measurement relied on treatment of the cells with protease inhibitor cocktail to prevent enzyme autocleavage, the cocktail would then interfere with the assessment of protease activity.

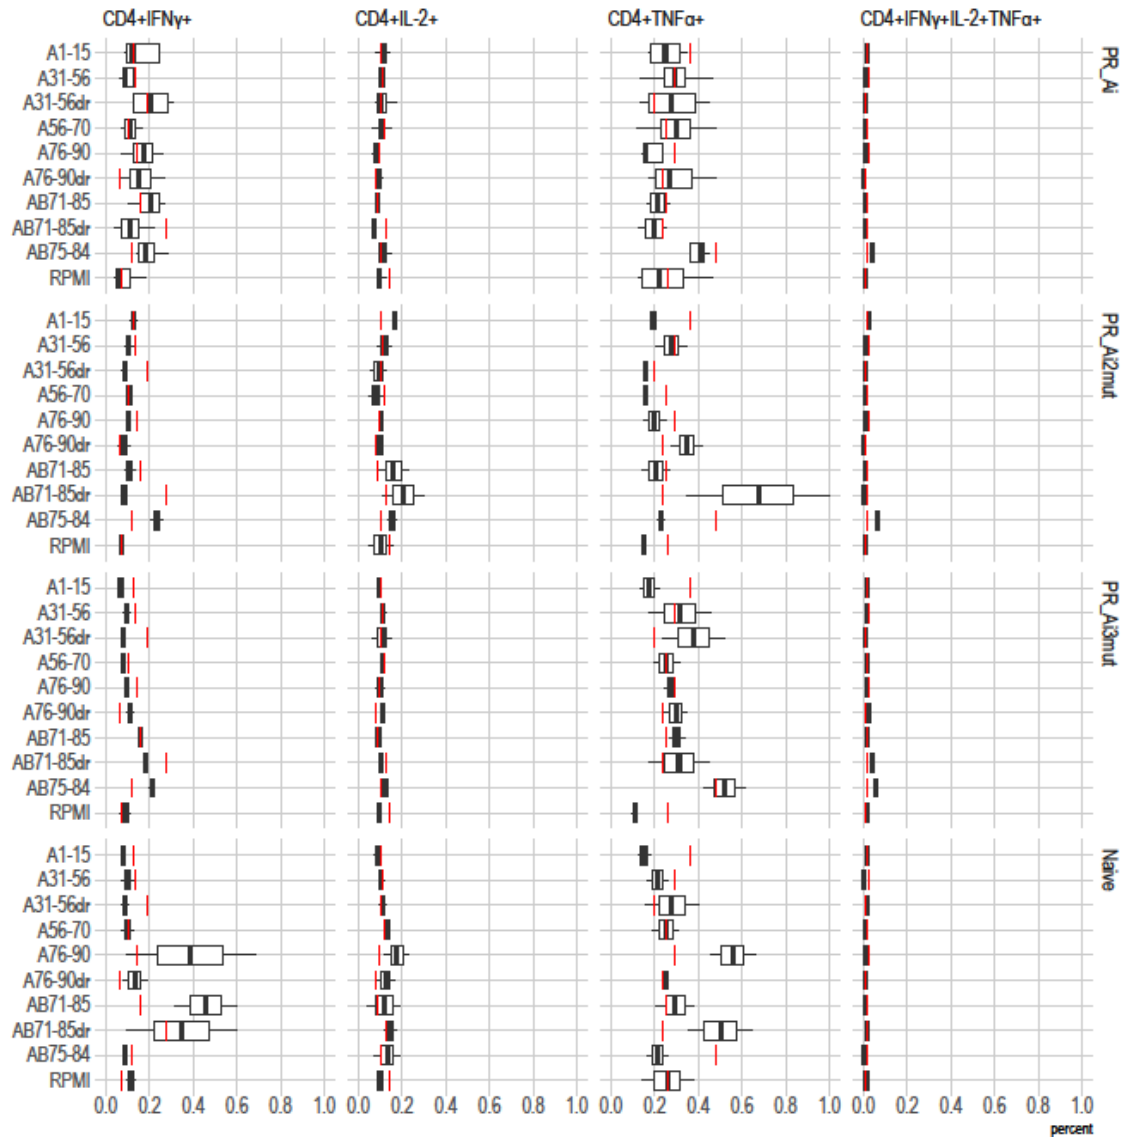

**Supplementary Figure S3. CD4+ T cells of mice DNA immunized with PR\_A variants exhibited no PR specific response to *in vitro* stimulation with peptides representing immunodominant epitopes of PR.** BALB/c mice were immunized with plasmids encoding PR\_Ai, or PR\_Ai2mut, or PR\_Ai3mut or empty vector pVAX1 (Table 1, Series II). Two weeks post booster immunization mice (n=5 per group) were sacrificed, their splenocytes were purified and frozen at -80<sup>o</sup> C. Week later, cells were thawed and subjected to stimulation with PR-derived peptides (Fig. 1C). IFN- $\gamma$ , IL-2 and TNF- $\alpha$  and triple cytokine production by stimulated T cells was assessed by flow cytometry with ICCS as described in the Materials and Methods. Frequencies of cytokine positive CD4+ T-cells secreting IFN- $\gamma$ , or IL-2, or TNF- $\alpha$  and triple IFN- $\gamma$ /IL-2/TNF- $\alpha$  cytokine secreting cells illustrated by box with whiskers; red line illustrate data for pVAX1 immunized mice. CD4+ reactivity to PR-derived peptides in mice DNA immunized with PR\_A variants did not differ from that exhibited by CD4+ T cells of naïve mice.

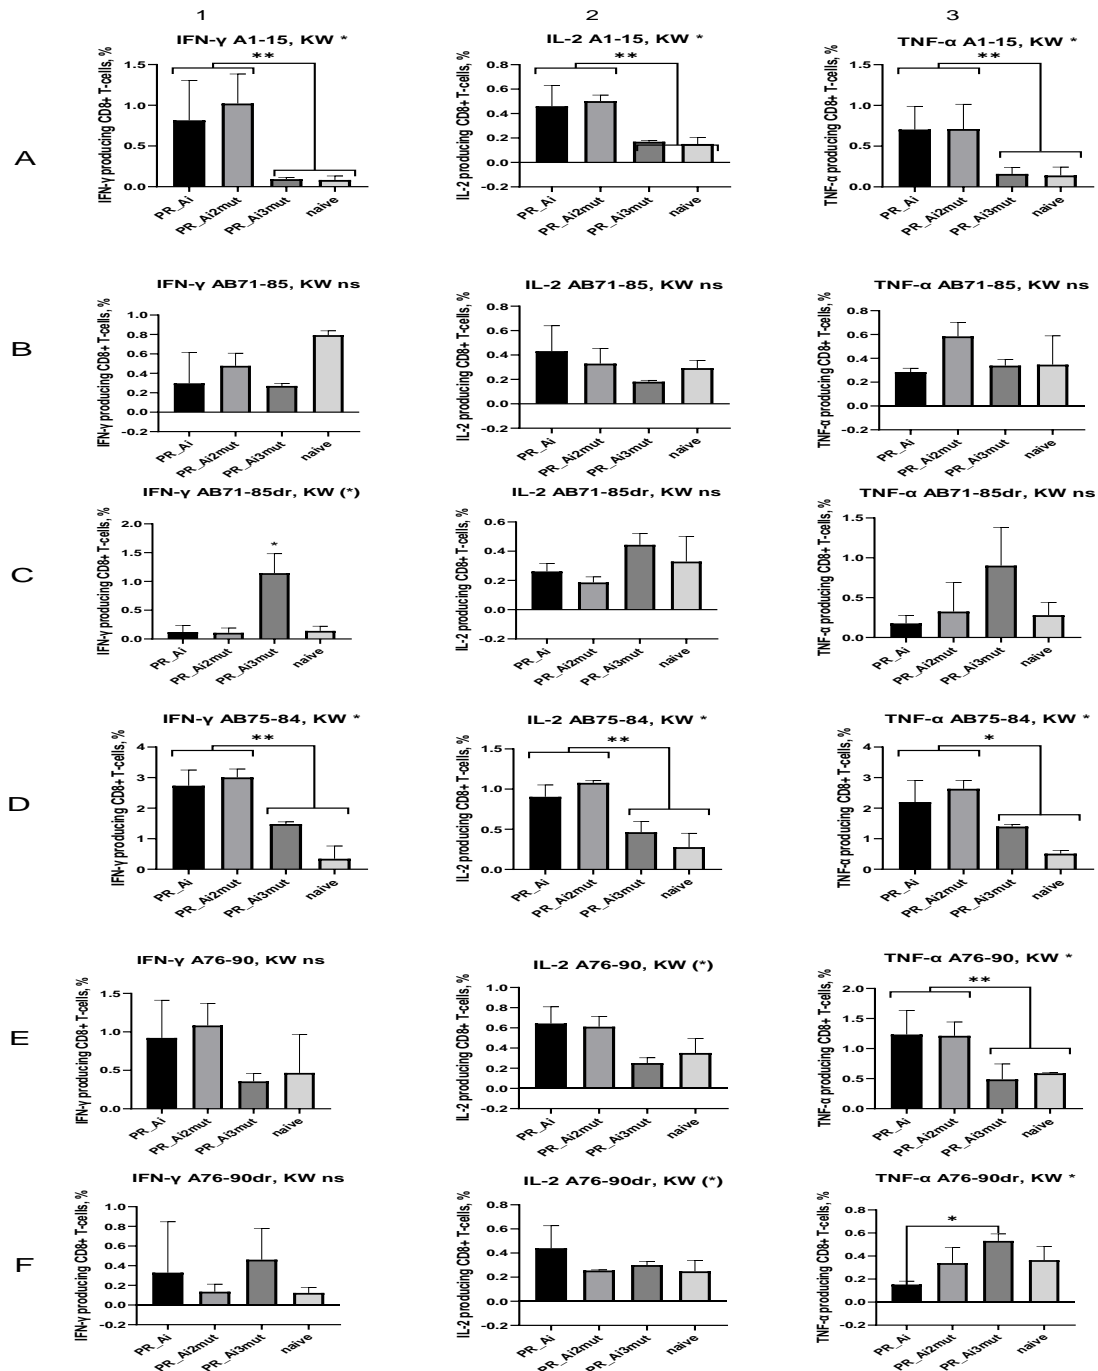

**Supplementary Figure S4 CD8+ T cell response of mice DNA immunized with PR\_A variants (Table 1, Series II) to stimulation with peptides representing immunodominant epitopes of PR.** Percent of CD8+ T cells responding to stimulation with peptides A1-15 (A), A71-85 (B), A71-85dr with mutation V82A (C), AB75-84 (D), A76-90 (E) and A7690dr with V82A mutation (F) by production of IFN-γ (A-F, panel 1), IL-2 (A-F, panel 2), or TNF-α (A-F, panel 3). BALB/c mice were immunized with plasmids encoding PR\_Ai, or PR\_Ai2mut, or PR\_Ai3mut or empty vector pVAX1 (Table 1, Series II). Two weeks post booster immunization mice (n=5 per group) were sacrificed, their splenocytes were purified and frozen at -80 °C. Week after, cells were thawed and subjected to stimulation with PR-derived peptides (Fig. 1C). T cell reactivity was assessed by flow cytometry with intracellular cytokine staining (ISSC) as described in the Materials and Methods. Difference between groups was first analyzed by Kruskal-Wallis, groups exhibiting no difference were pooled, and groups/pooled groups were re-analyzed by Mann Whitney U-test (as indicated in **Suppl Table S3**). KW\*, p<0.05; KW (\*), p<0.1; MW: \*p<0.05, \*\* p<0.01.

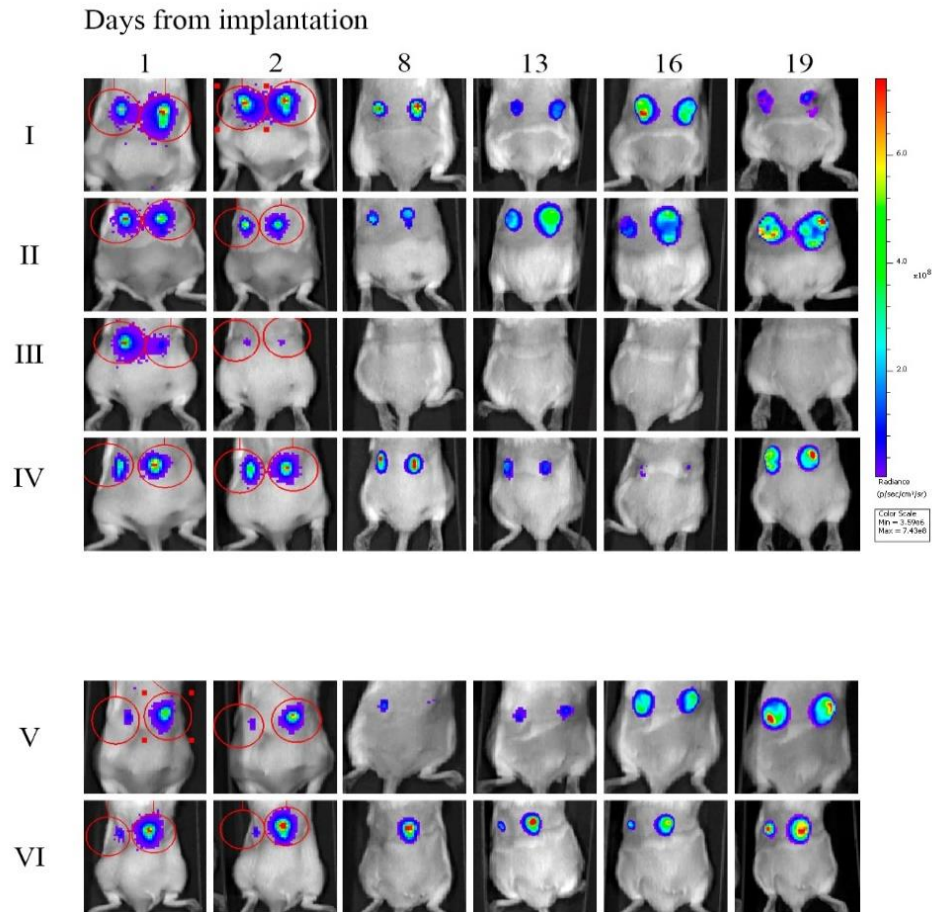

**Supplementary Figure S5. Immunization with PR\_Ai3mut identical to PR variant expressed by tumor cells protects mice against growth of PR\_Ai3mut expressing adenocarcinoma cells, while no protection is rendered by immunization with PR variants different in three (PR\_Ai) or even one amino acid residue (PR\_Ai2mut).** Mice were DNA immunized with PR\_Ai (panel I), PR\_Ai2mut (II); PR\_Ai3mut (III) and challenged with 4T1luc2 cells expressing PR\_Ai3mut (PR20.20), or with empty vector pVAX (panel IV) or PBS (V) and challenged with parental 4T1luc2 cells. Experimental scheme is presented in **Table 1, Series IV**. Growth of tumor cells at the sites of implantation was assessed by bioluminescent imaging (BLI, Spectrum, Perkin Elmer) on days 1, 2, 8, 13, 16 and 19 as depicted over the images. Panels represent dynamics of tumor growth in representative mice from each of the groups.

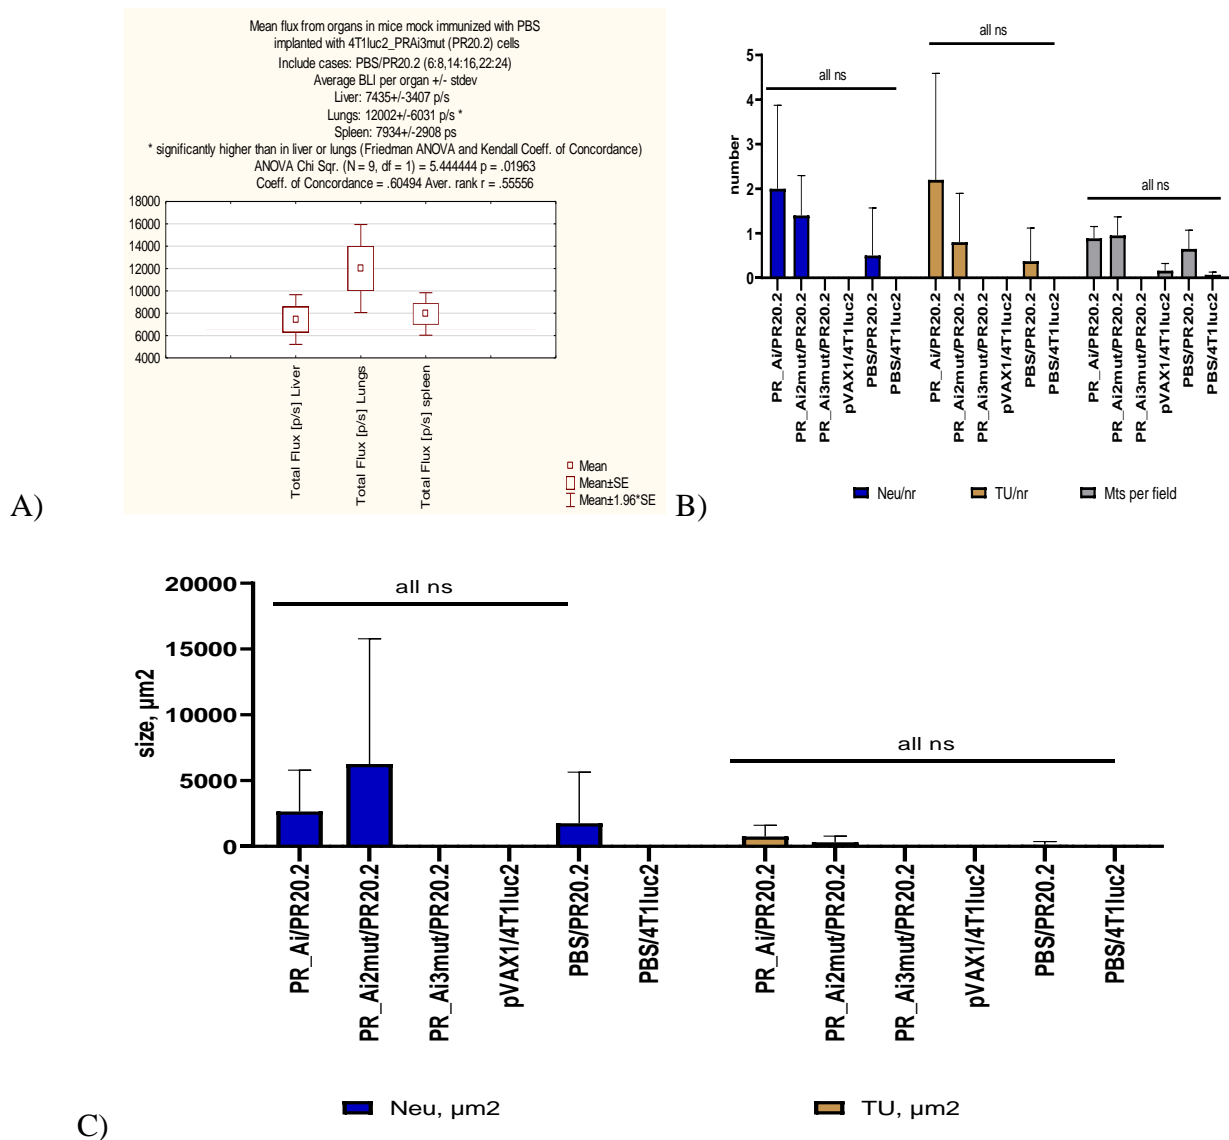

**Supplementary Figure S6. Migrational and metastatic activity of murine adenocarcinoma 4T1luc2 cells expressing inactivated consensus HIV-1 FSU\_A protease with drug resistance mutations M46I/I54V/V82A (PR20.2) and parental 4T1luc2 cells in mice DNA immunized with PR\_Ai variants and control animals (Table 1, Series IV).** Migration of PR20.2 cells into distal organs in control mice assessed by ex vivo organ imaging (A); Infiltration of PR20.2 and parental cells into the liver of mice DNA immunized with PR\_Ai variants and control animals: total nn of neutrophils in all assessed sections (Neu, nn), total nn of tumor cells without immune infiltrates in all assessed sections (TU, nn), average nn of metastases per field in all assessed sections (Mts, nn) (B); Average size of all detected neutrophil infiltrates (Neu,  $\mu\text{m}^2$ ), average size of metastasis formed by adenocarcinoma cells with no detected neutrophil infiltrates (TU,  $\mu\text{m}^2$ ) (C). Assessed groups: mice DNA immunized with PR\_Ai variants challenged with 4T1luc2\_PR20.2 cells (n=5 for each immunogen), PBS immunized mice challenged with 4T1luc2\_PR20.2 cells (n=9), vector immunized mice challenged with 4T1luc2 cells (n=5), PBS immunized controls challenged with 4T1luc2 cells. Histochemical assessment was done by independent pathologist on coded samples using computer-assisted morphometry with specialized NIS-Elements software (Nikon, Tokyo, Japan). Difference between the groups was analyzed by ordinary two-way ANOVA with Dunnet's multiple comparisons correction; ns -  $p > 0.05$ .

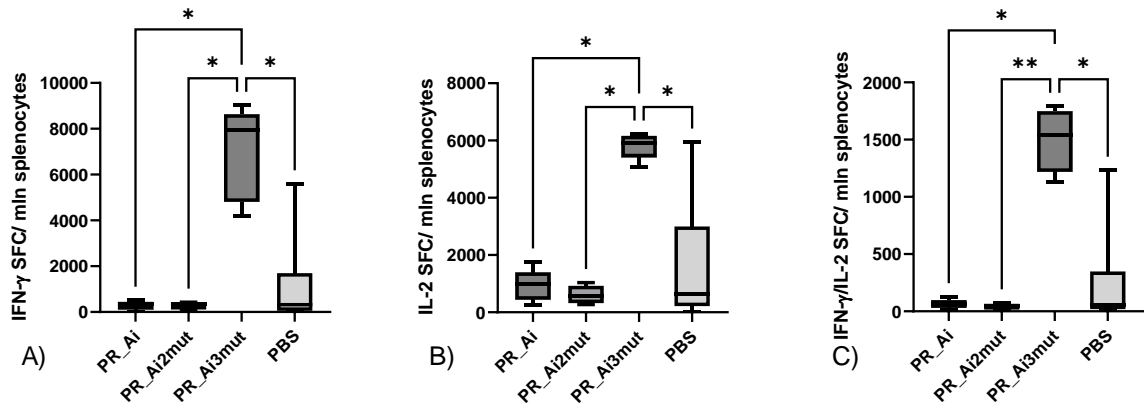

**Supplementary Figure S7. Splenocytes of mice DNA immunized with PR\_Ai3mut demonstrate preserved capacity to react to stimulation with mitogen Concanavalin A (ConA) with production of IFN- $\gamma$  (A), IL-2 (B) and dual production of IFN- $\gamma$ /IL-2 (C), whereas this capacity is lost in mice DNA immunized with PR\_A variants different from the one expressed by tumor cells (PR\_Ai, PR\_Ai2mut).** Mice were immunized as depicted in Series IV, Table 1, and post booster implanted with 4T1luc2\_PR20.2 cells. Twenty-one days after challenge splenocytes of mice were stimulated in vitro with ConA for 18 h, as described in Materials and Methods. In vitro secretion of IFN- $\gamma$ , IL-2, and dual secretion of IFN- $\gamma$ /IL-2 was measured as the number of signal-forming units (sfu) per mln splenocytes, average per group. Differences were analyzed by Kruskal-Wallis with Dunn's multiple comparisons correction. \* $p < 0.005$ , \*\* $p < 0.01$ .

Figure 2A

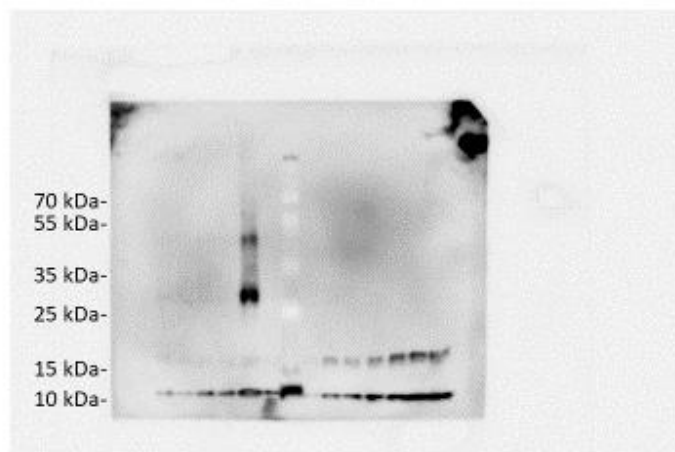

**Supplementary Figure S8 Original Western Blot for Figure 2A**

Figure 2B

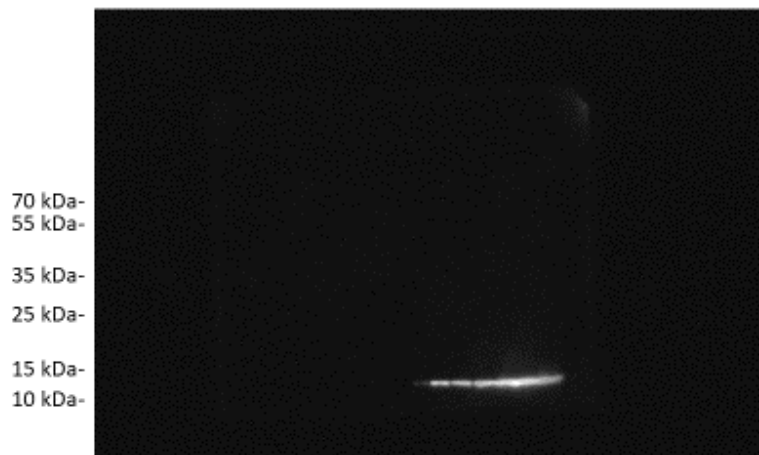

**Supplementary Figure S9 Original Western Blot for Figure 2B**

Figure 2C

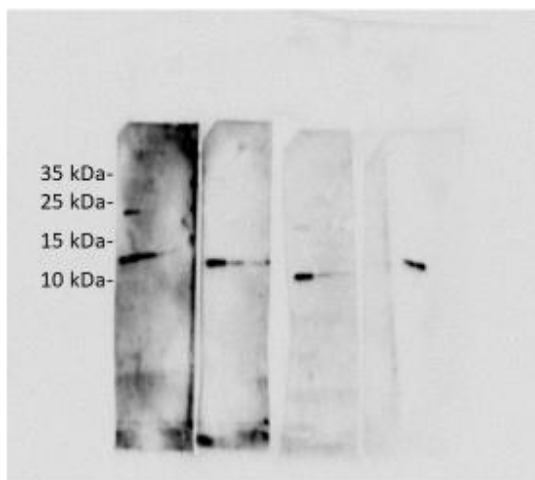

Panel 3 with colored ladder photo for example

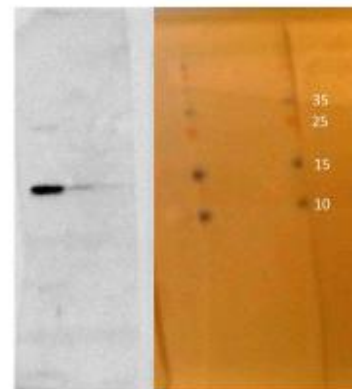

**Supplementary Figure S10 Original Western Blot for Figure 2C**

Figure 2D

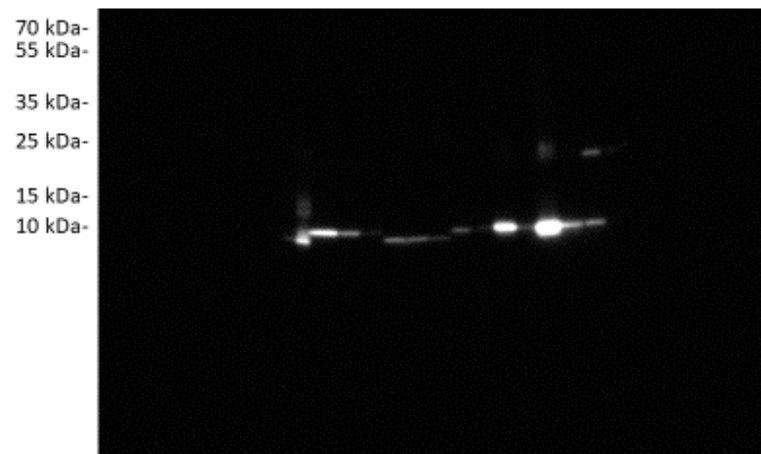

Supplementary Figure S11 Original Western Blot for Figure 2D

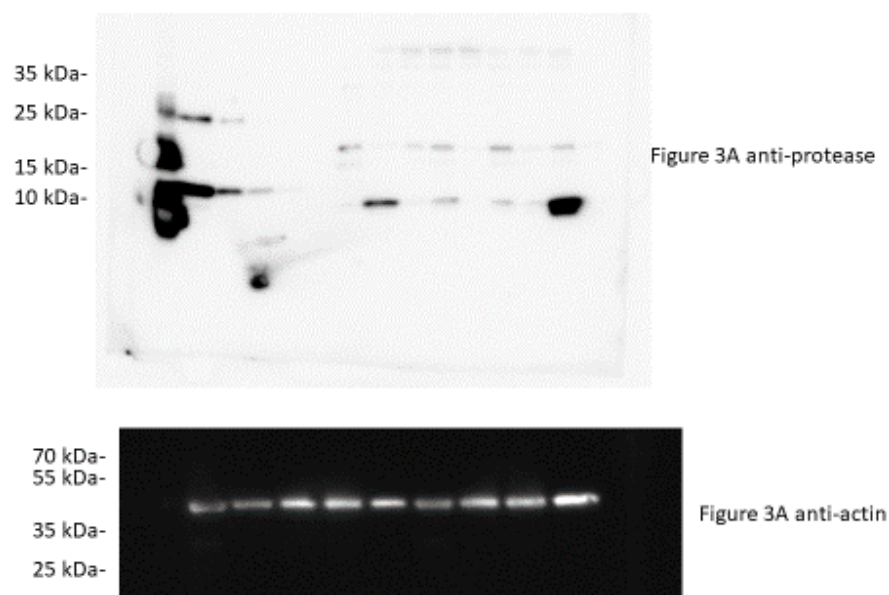

Supplementary Figure S12 Original Western Blot for Figure 3A



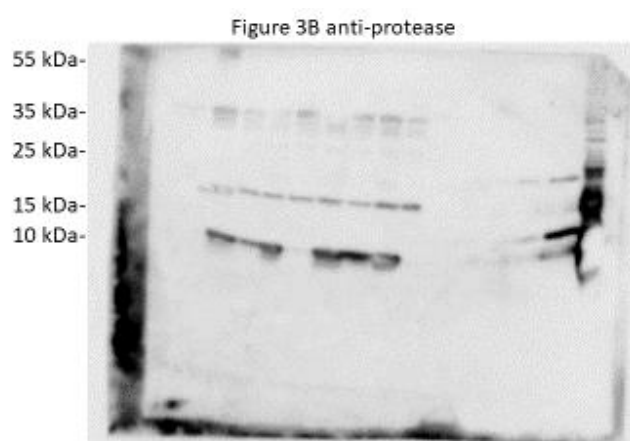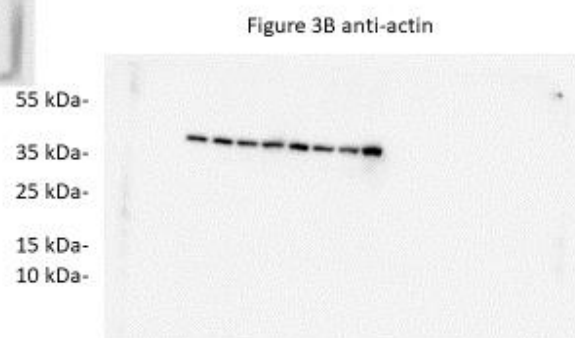

**Supplementary Figure S13 Original Western Blot for Figure 3B**
